# Supplementary material for: Tocotrienol-Rich Fraction of Palm Oil Improves Behavioral Impairments and Regulates Metabolic Pathways in AβPP/PS1 Mice
Source: PubMed Central journal article supplement — J Alzheimers Dis. 2018 Jun 8;64(1):249–67. doi: 10.3233/JAD-170880 (PMC6004929; doi:10.3233/jad-170880), 2018-06-08
Supplement: jad-64-jad170880-s001.pdf [file jad-64-jad170880-s001.pdf]

## **Supplementary Material**

### **Tocotrienol-rich fraction of palm oil improves behavioral impairments and regulates metabolic pathways in A $\beta$ PP/PS1 mice**

Lina Wati Durani, Hamizah Shahirah Hamezah, Nor Faeizah Ibrahim, Daijiro Yanagisawa, Muhammad Luqman Nasaruddin, Masaki Mori, Kamalrul Azlan Azizan, Hanafi Ahmad Damanhuri, Suzana Makpol, Wan Zurinah Wan Ngah, Ikuo Tooyama

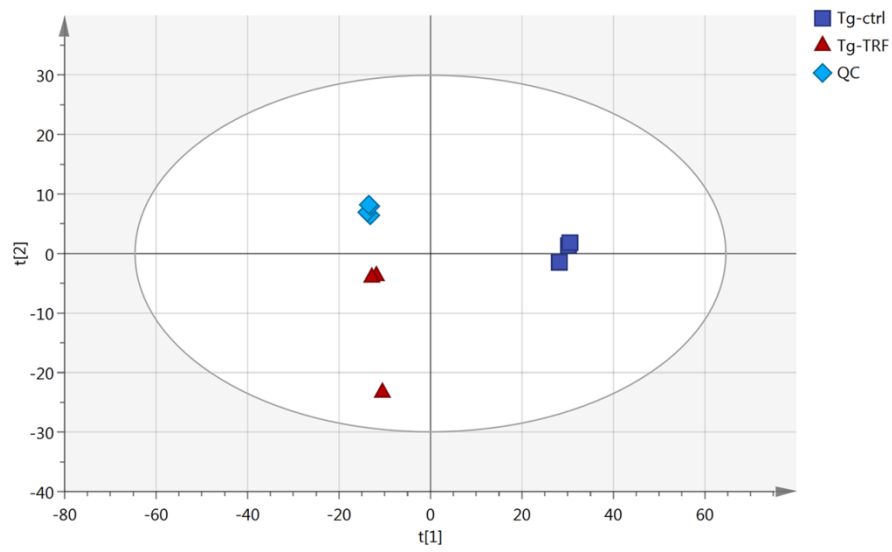

**Supplementary Fig. 1. A good clustering of quality control samples indicates stability during the analyses.**

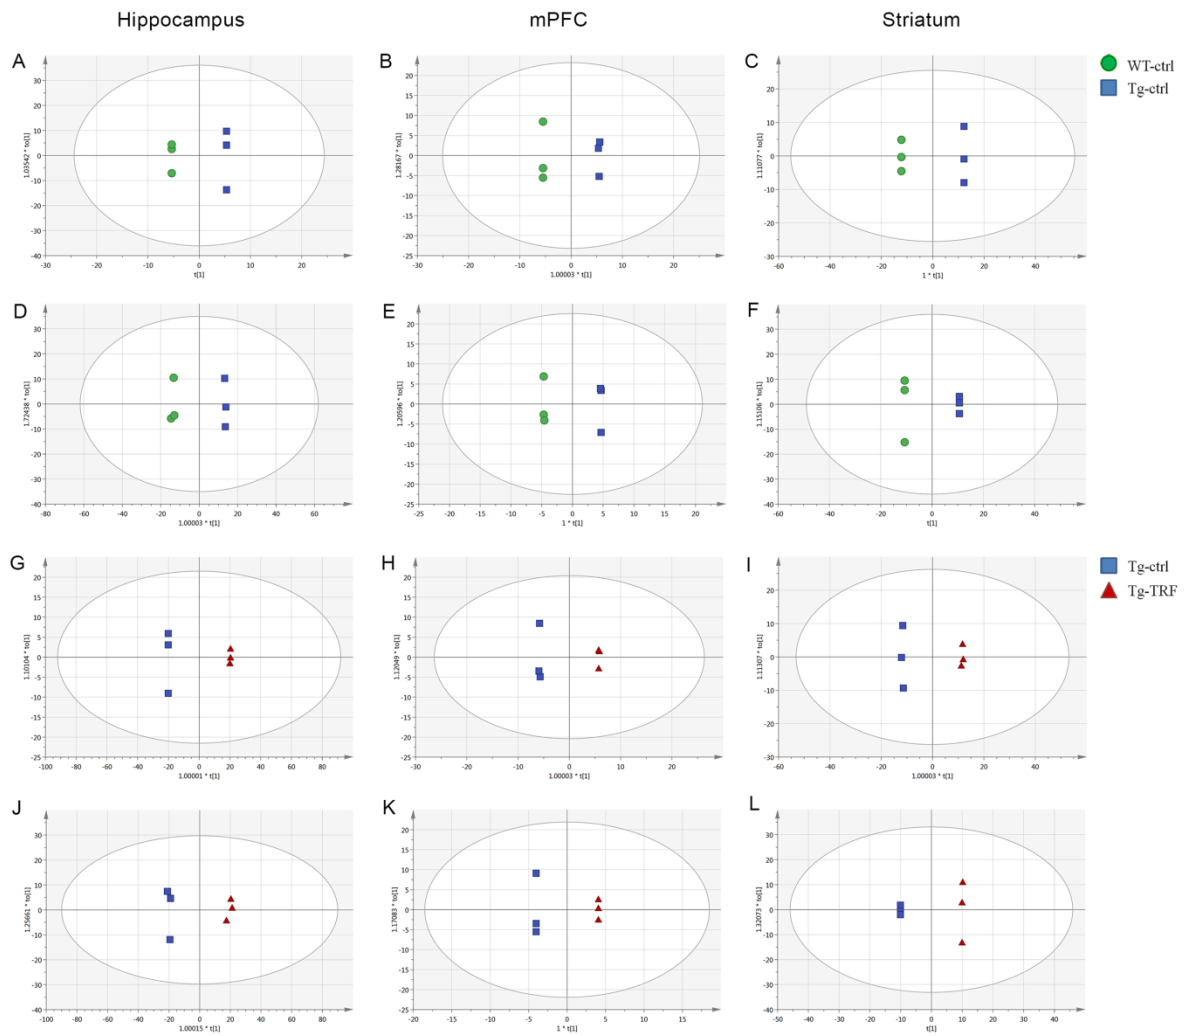

**Supplementary Fig. 2. Score plots of the OPLS-DA model for the hippocampus, mPFC, and striatum showing a clear separation between groups. A-C) OPLS-DA score plot model of the WT-ctrl and Tg-ctrl mice from ESI (+) analysis. D-F) OPLS-DA score plot model of the WT-ctrl and Tg-ctrl mice from ESI (-) analysis. G-I) OPLS-DA score plot model of the Tg-ctrl and Tg-TRF mice from ESI (+) analysis. J-L) OPLS-DA score plot model of the Tg-ctrl and Tg-TRF mice from ESI (-) analysis.**

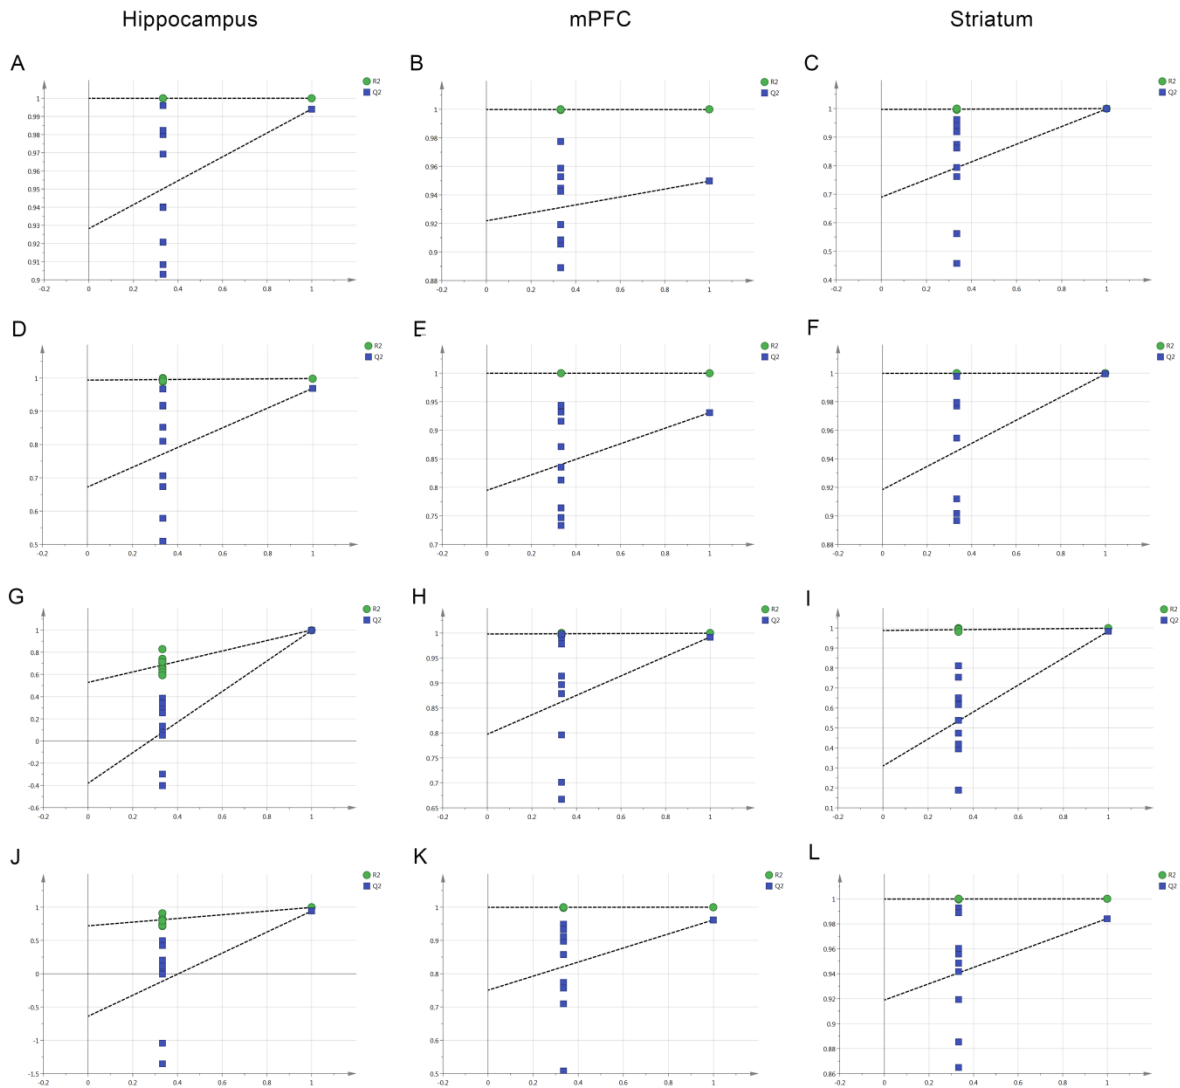

**Supplementary Fig. 3. Permutation analysis of OPLS-DA model derived from WT-ctrl versus Tg-ctrl and Tg-TRF versus Tg-ctrl.** Statistical validation of the OPLS-DA model by permutation analysis using 500 different model permutations.  $R^2_{Y(cum)}$  and  $Q^2_{(cum)}$  of the original model are indicated on the far right. A-C) Permutation analysis of OPLS-DA model derived from WT-ctrl versus Tg-ctrl from ESI (+) analysis. D-F) Permutation analysis of OPLS-DA model derived from WT-ctrl versus Tg-ctrl from ESI (-) analysis. G-I) Permutation analysis of OPLS-DA model derived from Tg-TRF versus Tg-ctrl from ESI (+) analysis. J-L) Permutation analysis of OPLS-DA model derived from Tg-TRF versus Tg-ctrl ESI (-) analysis.

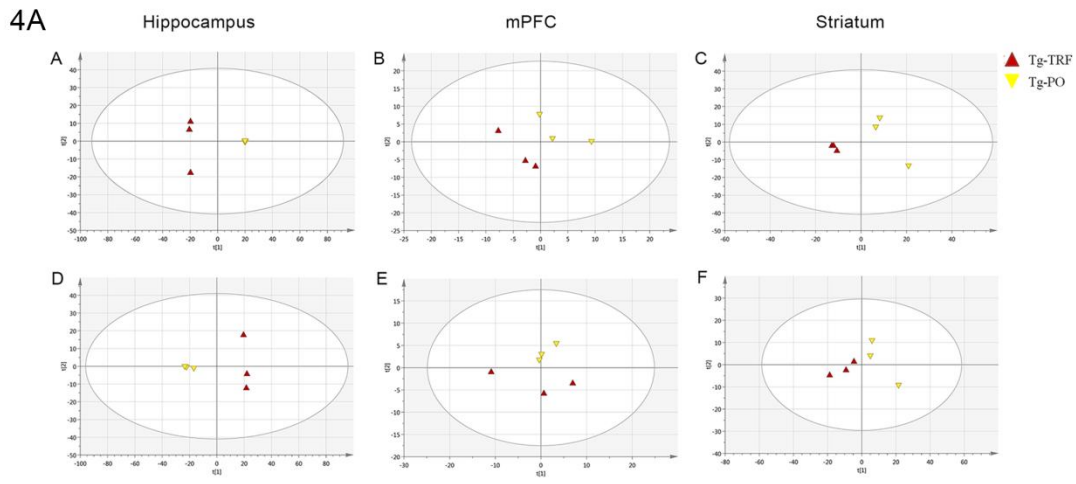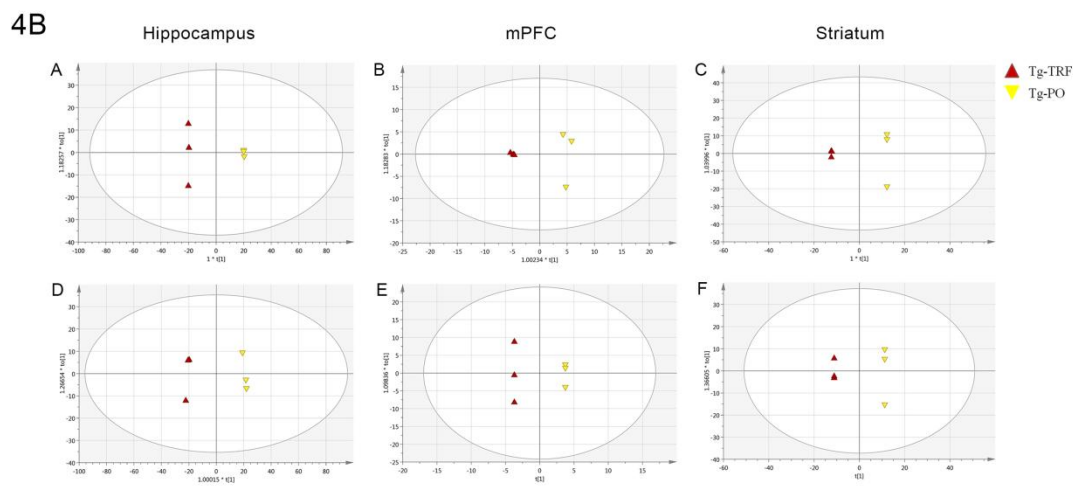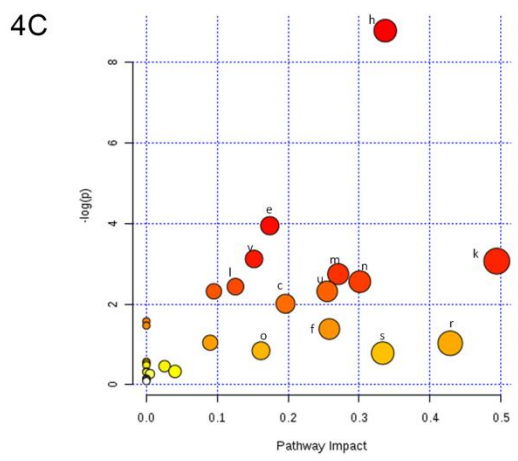

**Supplementary Fig. 4. Metabolomics analysis of Tg-TRF versus Tg-PO.** 4A) Principal component analyses (PCA) score plots. 4B) Score plots of the OPLS-DA model for the hippocampus, mPFC, and striatum. A-C) Results obtained by ESI (+) and (D-F) by ESI (-) modes. 4C) Pathway analysis overview showing altered metabolic pathways in the hippocampus region

from Tg-TRF versus Tg-PO. (c) Alanine, aspartate and glutamate metabolism; (e) Glycerophospholipid metabolism; (f) Glyoxylate and dicarboxylate metabolism; (k) Glutathione metabolism; (l) Citrate cycle (TCA cycle); (m) Pyrimidine metabolism; (n) Pentose phosphate pathway; (o) Cysteine and methionine metabolism; (r) Taurine and hypotaurine metabolism; (s) Valine, leucine and isoleucine biosynthesis; (u) Fructose and mannose metabolism; (v) Amino sugar and nucleotide sugar metabolism. Each node represents an altered metabolic pathway in the hippocampus of both groups. The color and size of each node is based on *p*-value and pathway impact-value, respectively.

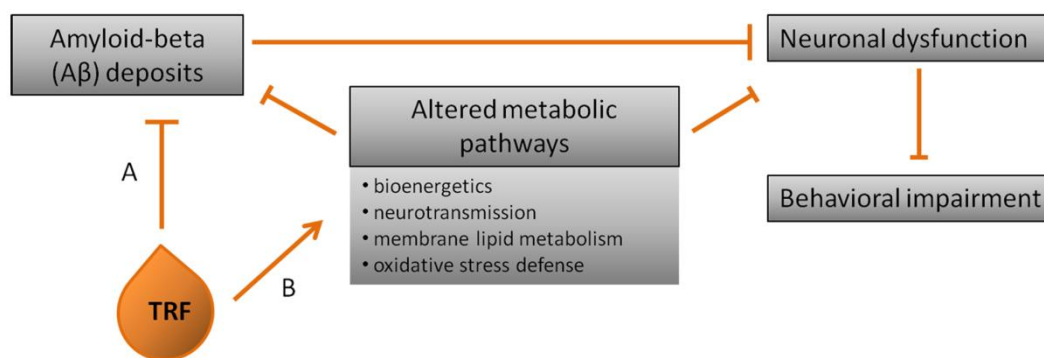

**Supplementary Fig. 5. Proposed mechanisms of TRF action in improving neuronal dysfunction and behavioral impairment** (see Results and Discussion sections for details of biochemical changes). A $\beta$  deposits and/or altered metabolic pathways cause neuronal dysfunction leading to behavioral impairment. (A) TRF modulates A $\beta$  deposition [19] and so improves neuronal dysfunction and reduces impairment of behavior; (B) TRF modulates metabolic pathways dependent on and/or independent of A $\beta$  interaction, and so improves neuronal dysfunction and reduces impairment of behavior.

| Putative ID           | ESI | Formula         | m/z       | rt    | $\Delta$ Mass [Da] | $\Delta$ Mass [ppm] | MS/MS Fragment (Intensity)                                                                                                                                                                                                                                                                              | Identifier     |
|-----------------------|-----|-----------------|-----------|-------|--------------------|---------------------|---------------------------------------------------------------------------------------------------------------------------------------------------------------------------------------------------------------------------------------------------------------------------------------------------------|----------------|
| Hippocampus           |     |                 |           |       |                    |                     |                                                                                                                                                                                                                                                                                                         |                |
| L-Aspartic acid       | +   | C4 H7 N O4      | 134.0444  | 1.020 | 4.32E-04           | 3.247               | 70.02901 (72561)<br>74.02393 (1071012)<br>88.03948 (846268)<br>116.03433 (129193)<br>134.04495 (59817)                                                                                                                                                                                                  | 462 (mzCloud)  |
| N-Acetylaspartic acid | -   | C6 H9 N O5      | 174.03961 | 0.964 | 1.07E-03           | 6.097               | 58.02878 (1836288)<br>59.01279 (749707)<br>70.02876 (184283)<br>71.01277 (395320)<br>88.03926 (4929591)<br>89.04241 (82518)<br>96.99199 (190332)<br>112.03925 (216181)<br>114.0185 (585333)<br>115.00252 (510750)<br>130.04985 (666340)<br>132.0291 (59357)<br>156.02907 (161178)<br>174.03986 (436207) | 1376 (mzCloud) |
| L-Tyrosine            | -   | C9 H11 N O3     | 180.06551 | 1.440 | 1.01E-03           | 5.593               | 72.00792 (17331)<br>93.03358 (11032)<br>119.04909 (38250)<br>163.03903 (43128)<br>180.06589 (31250)                                                                                                                                                                                                     | 2255 (mzCloud) |
| L-Glutamic acid       | -   | C5 H9 N O4      | 146.0448  | 0.510 | 1.16E-03           | 7.909               | 102.05487 (4142793)<br>103.05834 (84777)<br>128.03416 (1410582)<br>146.04471 (327154)                                                                                                                                                                                                                   | 470 (mzCloud)  |
| DL-Glutamine          | +   | C5 H10 N2 O3    | 147.0759  | 0.497 | 5.08E-04           | 3.480               | 84.04458 (10953530)<br>101.07116 (400909)<br>112.57800 (256098)<br>130.04964 (7827806)<br>147.07579 (272782)                                                                                                                                                                                            | 2967 (mzCloud) |
| L-Phenylalanine       | +   | C9 H11 N O2     | 166.08585 | 2.255 | 4.10E-04           | 2.484               | 103.05431 (180995)<br>107.04904 (31552)<br>120.08064 (2327546)<br>131.04875 (32395)<br>166.08615 (28407)                                                                                                                                                                                                | 8 (mzCloud)    |
| L-Histidine           | -   | C6 H9 N3 O2     | 154.06114 | 0.466 | 1.06E-03           | 6.822               | 78.95803 (7829)<br>93.04461 (17724)<br>96.95924 (2607)<br>110.98306 (7891)<br>137.03464 (9854)<br>154.06146 (15558)                                                                                                                                                                                     | 473 (mzCloud)  |
| Pyroglutamate         | +   | C5 H7 N O3      | 130.0495  | 0.498 | 3.46E-04           | 2.681               | 56.04991 (1147593)<br>84.04457 (60139000)<br>85.02853 (3600213)<br>130.04961 (16462560)                                                                                                                                                                                                                 | 1831 (mzCloud) |
| Creatinine            | +   | C4 H7 N3 O      | 114.06602 | 0.516 | 1.32E-04           | 1.164               | 72.04445 (43885)<br>86.07138 (517373)<br>114.06604 (5075335)<br>115.06945 (52813)                                                                                                                                                                                                                       | 375 (mzCloud)  |
| AMP                   | +   | C10 H14 N5 O7 P | 348.0689  | 1.068 | 1.37E-03           | 3.951               | 97.02847 (293650)<br>119.03502 (40680)<br>136.06131 (5068331)<br>250.09258 (6041)<br>348.06921 (300388)                                                                                                                                                                                                 | 252 (mzCloud)  |
| IMP                   | -   | C10 H13 N4 O8 P | 347.03943 | 1.318 | 5.57E-04           | 1.600               | 78.95795 (832014)<br>96.96847 (264402)<br>135.03011 (151816)<br>138.97932 (10941)<br>150.97920 (18203)<br>192.98981 (4927)<br>211.00082 (32360)<br>347.03937 (188306)                                                                                                                                   | 452 (mzCloud)  |

| Putative ID          | ESI | Formula                                                         | m/z       | rt    | $\Delta$ Mass [Da] | $\Delta$ Mass [ppm] | MS/MS Fragment (Intensity)                                                                                                                                                                                                                                                           | Identifier     |
|----------------------|-----|-----------------------------------------------------------------|-----------|-------|--------------------|---------------------|--------------------------------------------------------------------------------------------------------------------------------------------------------------------------------------------------------------------------------------------------------------------------------------|----------------|
| Hippocampus          |     |                                                                 |           |       |                    |                     |                                                                                                                                                                                                                                                                                      |                |
| UMP                  | -   | C <sub>9</sub> H <sub>13</sub> N <sub>2</sub> O <sub>9</sub> P  | 323.02802 | 0.952 | 3.03E-04           | 0.935               | 78.95794 (3908848)<br>96.96848 (1921299)<br>111.01881 (413424)<br>138.97920 (156423)<br>150.97896 (140122)<br>192.99040 (57262)<br>211.00058 (281547)<br>280.02084 (125773)<br>323.02814 (986284)                                                                                    | 1405 (mzCloud) |
| Adenosine            | +   | C <sub>10</sub> H <sub>13</sub> N <sub>5</sub> O <sub>4</sub>   | 268.10309 | 1.952 | 9.37E-04           | 3.507               | 92.02445 (7280)<br>109.05083 (19368)<br>135.63580 (60255)<br>136.06136 (37938320)<br>268.10352 (2302890)                                                                                                                                                                             | 297 (mzCloud)  |
| Adenine              | +   | C <sub>5</sub> H <sub>5</sub> N <sub>5</sub>                    | 136.0614  | 0.781 | 4.01E-04           | 2.969               | 94.04015 (19085)<br>109.01020 (3980)<br>119.03522 (65555)<br>136.06139 (700796)<br>137.06464 (10352)                                                                                                                                                                                 | 296 (mzCloud)  |
| Inosine              | +   | C <sub>10</sub> H <sub>12</sub> N <sub>4</sub> O <sub>5</sub>   | 269.08713 | 2.025 | 8.90E-04           | 3.322               | 94.04008 (11449)<br>110.03481 (27618)<br>119.03503 (32021)<br>136.06128 (10655)<br>137.04535 (2868747)                                                                                                                                                                               | 1234 (mzCloud) |
| Guanine              | +   | C <sub>5</sub> H <sub>5</sub> N <sub>5</sub> O                  | 152.05634 | 1.244 | 3.91E-04           | 2.585               | 109.05067 (12500)<br>110.03490 (73542)<br>128.04521 (33436)<br>134.04561 (4597)<br>135.02986 (152069)<br>136.01338 (3026)<br>152.05626 (825161)<br>153.04027 (206137)                                                                                                                | 436 (mzCloud)  |
| Uridine              | -   | C <sub>9</sub> H <sub>12</sub> N <sub>2</sub> O <sub>6</sub>    | 243.06168 | 1.641 | 5.32E-04           | 2.178               | 66.03380 (52017)<br>82.02872 (95611)<br>94.02869 (13652)<br>110.02361 (359505)<br>111.01904 (17044)<br>122.02360 (35150)<br>124.03923 (15376)<br>140.03418 (37072)<br>152.03438 (63228)<br>153.02966 (25435)<br>200.05579 (108735)<br>243.06180 (67361)                              | 1408 (mzCloud) |
| DL-Malic acid        | -   | C <sub>4</sub> H <sub>6</sub> O <sub>5</sub>                    | 133.01306 | 0.711 | 1.12E-03           | 8.365               | 71.01279 (129810)<br>72.99209 (27651)<br>87.00748 (2163)<br>89.02341 (7529)<br>115.00258 (134890)<br>133.01329 (17939)                                                                                                                                                               | 1796 (mzCloud) |
| Choline              | +   | C <sub>5</sub> H <sub>13</sub> N O                              | 104.10697 | 0.520 | 3.68E-05           | 0.357               | 58.06544 (412233)<br>60.08112 (5030140)<br>104.10701 (42907310)<br>105.11051 (339415)                                                                                                                                                                                                | 886 (mzCloud)  |
| Acetylcholine        | +   | C <sub>7</sub> H <sub>15</sub> N O <sub>2</sub>                 | 146.11714 | 0.611 | 4.19E-04           | 2.885               | 60.08110 (100435)<br>87.04420 (467344)<br>146.11710 (303644)                                                                                                                                                                                                                         | 885 (mzCloud)  |
| S-Adenosylmethionine | +   | C <sub>15</sub> H <sub>22</sub> N <sub>6</sub> O <sub>5</sub> S | 399.14316 | 0.485 | 1.06E-03           | 2.671               | 74.02385 (99571)<br>74.06051 (108351)<br>84.04464 (79892)<br>97.02847 (2587430)<br>102.05499 (1131514)<br>136.06136 (3961221)<br>145.03169 (99633)<br>163.04179 (88410)<br>232.08234 (23260)<br>250.09261 (3997892)<br>264.08871 (210626)<br>298.09598 (708748)<br>399.14557 (37313) | 896 (mzCloud)  |



| Putative ID                          | ESI | Formula           | m/z       | rt    | $\Delta$ Mass [Da] | $\Delta$ Mass [ppm] | MS/MS Fragment (Intensity)                                                                                                                                                                                                                                   | Identifier     |
|--------------------------------------|-----|-------------------|-----------|-------|--------------------|---------------------|--------------------------------------------------------------------------------------------------------------------------------------------------------------------------------------------------------------------------------------------------------------|----------------|
| <b>Hippocampus</b>                   |     |                   |           |       |                    |                     |                                                                                                                                                                                                                                                              |                |
| Spermidine                           | +   | C7 H19 N3         | 146.16478 | 0.365 | 4.05E-04           | 2.792               | 72.08102 (234730)<br>84.08090 (26529)<br>112.11225 (102006)<br>129.13849 (23127)                                                                                                                                                                             | 9 (mzCloud)    |
| $\gamma$ -Aminobutyric acid          | +   | C4 H9 N O2        | 104.07059 | 0.475 | 1.72E-04           | 1.665               | 68.04982 (235966)<br>69.03378 (2796529)<br>86.06027 (2521131)<br>87.04420 (13690050)<br>88.04769 (67834)<br>104.07070 (725285)                                                                                                                               | 796 (mzCloud)  |
| Uric acid                            | -   | C5 H4 N4 O3       | 167.02002 | 1.163 | 1.01E-03           | 6.009               | 80.96395 (2139)<br>96.01920 (40808)<br>124.01412 (147489)<br>167.02008 (189653)                                                                                                                                                                              | 753 (mzCloud)  |
| Nicotinamide                         | +   | C6 H6 N2 O        | 123.05505 | 1.162 | 2.27E-04           | 1.862               | 78.03405 (25147)<br>79.05419 (3350)<br>80.04965 (544907)<br>81.05305 (4864)<br>96.04448 (204205)<br>105.04488 (4283)<br>106.02873 (63079)<br>123.05506 (2645485)<br>124.05951 (41312)                                                                        | 517 (mzCloud)  |
| <b>Striatum</b>                      |     |                   |           |       |                    |                     |                                                                                                                                                                                                                                                              |                |
| $\gamma$ -Glutamylcysteine           | +   | C8 H14 N2 O5 S    | 251.06882 | 0.949 | 7.75E-04           | 3.098               | 76.02179 (71877)<br>84.04455 (539899)<br>86.99010 (22744)<br>102.05510 (13007)<br>105.00049 (77426)<br>122.02686 (578442)<br>130.04958 (303728)<br>142.03177 (122712)<br>188.03696 (111468)<br>233.05818 (12337)<br>234.04202 (106039)<br>251.06908 (190576) | 427 (mzCloud)  |
| $\gamma$ -L-Glutamyl-L-glutamic acid | +   | C10 H16 N2 O7     | 277.1022  | 0.682 | 7.58E-04           | 2.747               | 84.04459 (383115)<br>85.02856 (14166)<br>102.05505 (114513)<br>130.04959 (240801)<br>148.06000 (361355)<br>168.06526 (49144)<br>196.05957 (15074)<br>214.06999 (31927)<br>260.07578 (31516)<br>277.10263 (80568)                                             | 1223 (mzCloud) |
| ADP ribose                           | -   | C15 H23 N5 O14 P2 | 558.0636  | 0.847 | 4.45E-04           | 0.796               | 78.95797 (589954)<br>96.96850 (157642)<br>150.97948 (12357)<br>158.92430 (80790)<br>211.00092 (20022)<br>272.95782 (8417)<br>346.05551 (184471)<br>408.01239 (5145)<br>558.06329 (44432)                                                                     | 1708 (mzCloud) |
| Acetyl-L-carnitine                   | +   | C9 H17 N O4       | 204.12244 | 0.799 | 5.76E-04           | 2.835               | 60.08109 (176410)<br>85.02856 (2945815)<br>144.10155 (131517)<br>145.04921 (417959)<br>204.12250 (1271263)                                                                                                                                                   | 879 (mzCloud)  |
| 6 $\beta$ -Prostaglandin II          | -   | C20 H34 O5        | 353.2333  | 6.225 | 1.60E-04           | 0.452               | 193.12254 (9851)<br>317.20859 (2821)<br>353.23349 (63875)                                                                                                                                                                                                    | 4594 (mzCloud) |

**Supplementary Table 1.** Putatively identified metabolites with MS/MS fragment information.
